# Supplementary material
Source: publisher figshare collection journal article supplement (https://acs.figshare.com/ndownloader/files/4395124)
Supplement: Supplementary file 1 [file 4395124]

## Supporting Information

### Self-assembled Helical Nanofibers made of Achiral Molecular Disks having Molecular Adapter

Mutsumi Kimura,<sup>\*</sup> Tatsuya Hatanaka, Hirotaka Nomoto, Junko Takizawa, Tadashi Fukawa, Yoko Tatewaki,<sup>†</sup> and Hirofusa Shirai

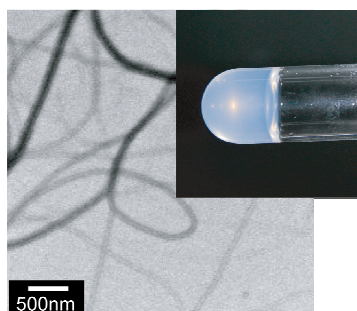

Fig. S1. TEM image of 2-methoxyethanol gel made of **1**.  
The inset shows optical image of turbid gel of **1**.

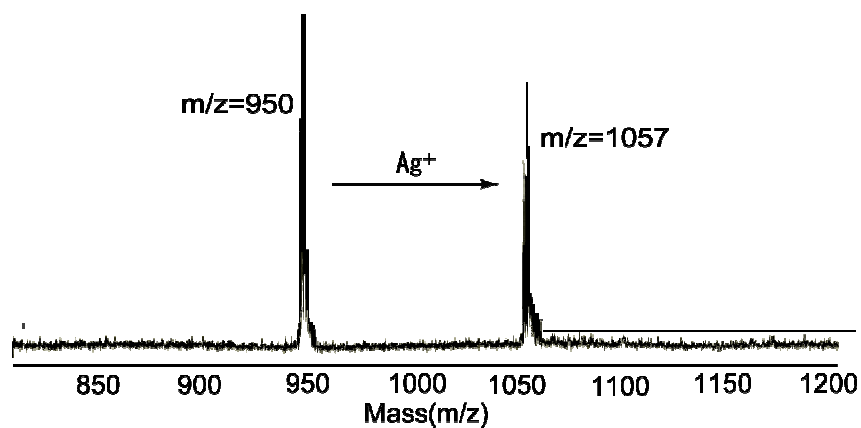

Fig. S2 MALDI-TOF mass spectrum of **2** with  $\text{AgNO}_3$

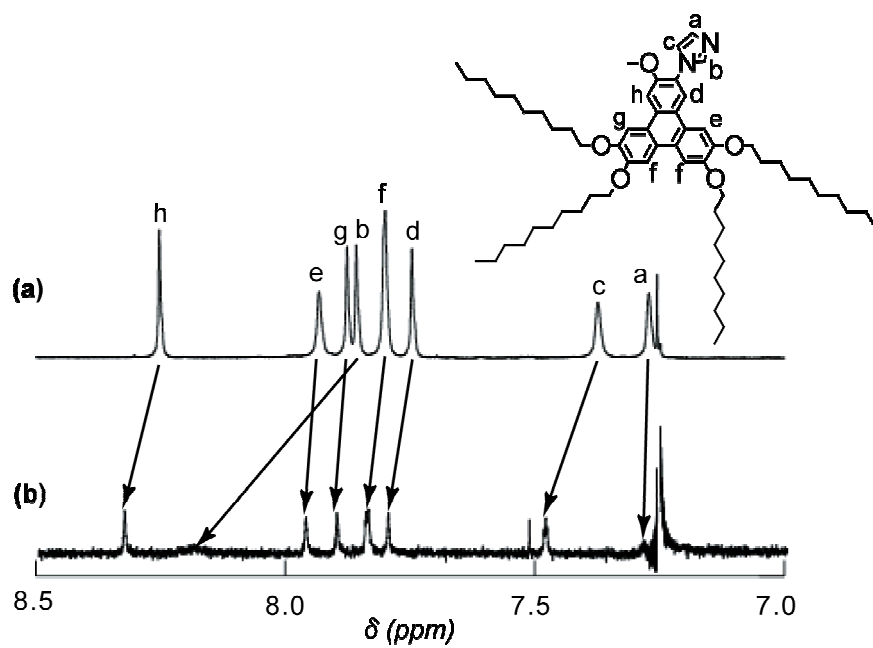

Fig. S3  $^1\text{H}$  NMR spectra of **2** (a) and the mixture of **2** and  $\text{AgNO}_3$  (b) in  $\text{CDCl}_3$
